# Supplementary material
Source: publisher figshare collection journal article supplement (https://microbiology.figshare.com/articles/dataset/_/4123320)
Supplement: Supplementary file 1 [file 2]

## Sheet: Massilia 
	Habitate of Isolation	NCBI Assembly ID	IMG Genome ID	Genome Size	Gene Count	Type II	Type II	Type II	Type II	Type II	Type II	Type II	Type II	Type II	Type II	Type II	Type II	Type II	Type II	Type II	Type II	Type II	Type III	Type III	Type III	Type III	Type III	Type III	Type III	Type III	Type III	Type III	Type III	Type III	Type III	Type III	Type III	Type III	Type III	Type III	Type IV	Type IV	Type IV	Type IV	Type IV	Type IV	Type IV	Type IV	Type IV
						K02450	K02451	K02452	K02453	K02454	K02455	K02456	K02457	K02458	K02459	K02460	K02461	K02462	K02463	K02464	K02465	K02654	K03219	K03220	K03221	K03222	K03223	K03224	K03225	K03226	K03227	K03228	K03229	K03230	K04053	K04054	K04056	K04057	K04058	K04059	K03194	K03195	K03196	K03197	K03198	K03199	K030200	K030201	K030202
Massilia sp. Leaf139	Arabidopsis Phyllosphere	GCA_001424165.1	2643221809	5387355	4786				2	3	3	5
Massilia alkalitolerans DSM 17462	Soil	GCA_000427785.1	2513237112	6113501	5501				2	3	2	4
Massilia consociata BSC265	Soil	GCA_000740675.1	2597490195	5326161	4746				2	3	2	5
Massilia timonae CCUG 45783	Human blood	GCA_000315425.1	2531839286	6038400	5317		2		2	3	2	4
Massilia niastensis DSM 21313	Air	GCA_000382345.1	2521172636	6596637	5888				2	3	2	5
Massilia sp. 9096		GCA_000745265.1	2582581251	5710276	5068				2	3	2	4
Massilia sp. PDC64	Populus Rhizosphere	N/A	2684623005	7515134	6619				2	3	2	5
Massilia sp. Root133	Arabidopsis Rhizosphere	GCA_001426525.1	2643221684	7145183	6243				2	3	2	5
Massilia sp. WG5	Soil	GCA_001412595.1	2684623087	6267305	5672				3	4	3	7
Massilia sp. WF1	Soil	GCA_001028775.2	2645727922	6066684	5462				3	4	3	6
Janthinobacterium sp. CG3	Glacier stream	GCA_000344615.1	2516493029	6265216	5535				6	7	5	12
				Average Genome Size of Non-Endohyphal Bacteria
				6.27216e+06
				513095
[truncated: 43 more columns]

## Sheet: Rhizobium 
	Habitat of Isolation	NCBI Assembly ID	IMG Genome ID	Genome Size	Gene Count	Type II	Type II	Type II	Type II	Type II	Type II	Type II	Type II	Type II	Type II	Type II	Type II	Type II	Type II	Type II	Type II	Type II	Type III	Type III	Type III	Type III	Type III	Type III	Type III	Type III	Type III	Type III	Type III	Type III	Type III	Type III	Type III	Type III	Type III	Type III	Type IV	Type IV	Type IV	Type IV	Type IV	Type IV	Type IV	Type IV	Type IV
						K02450	K02451	K02452	K02453	K02454	K02455	K02456	K02457	K02458	K02459	K02460	K02461	K02462	K02463	K02464	K02465	K02654	K03219	K03220	K03221	K03222	K03223	K03224	K03225	K03226	K03227	K03228	K03229	K03230	K04053	K04054	K04056	K04057	K04058	K04059	K03194	K03195	K03196	K03197	K03198	K03199	K030200	K030201	K030202
Rhizobium sp. CF097	Populus root endosphere	N/A	2582581866	6859583	6629
Rhizobium giardinii bv. giardinii H152	Phaseolus vulgaris root nodule	GCA_000379605.1	2513237159	6810126	6691																																						4	4	4	6	4
Rhizobium sp. OK665	Populus root endosphere	N/A	2582581283	6030556	5747																																					3	3	3	3	3	2	2
Rhizobium sp. CF258	Populus root endosphere	N/A	2582581865	6644329	6374
Rhizobium sp. YR295	Populus root endosphere	N/A	2582581306	6450535	6149																																						2	2	2	2
Rhizobium sp. 9140		GCA_900067135.1	2602042090	5428940	5228																																					2	2	2	2	2	2
Rhizobium sp. NFR03	Switchgrass rhizosphere	N/A	2599185156	5403036	5118				2	2	2	2																														3	2	2	2	2	3
Rhizobium sp. Leaf371	Arabidopsis phyllosphere	GCA_001424045.1	2643221931	5085899	4691
Rhizobium sp. Leaf384	Arabidopsis phyllosphere	GCA_001424065.1	2643221934	4881596	4479
Rhizobium sp. Leaf383	Arabidopsis phyllosphere	GCA_001425345.1	2643221933	5014728	4640
Ensifer meliloti 1021	Medicago root nodule	GCA_000006965.1	637000269	6691694	6295																																										2
			Average Genome Size of Non-Endohyphal Bacteria
			5.98721e+06
			1.28218e+09
[truncated: 43 more columns]

## Sheet: Burkholderia 
	Habitat of Isolation	NCBI Assembly ID	IMG Genome ID	Genome Size	Gene Count	Type II	Type II	Type II	Type II	Type II	Type II	Type II	Type II	Type II	Type II	Type II	Type II	Type II	Type II	Type II	Type II	Type II	Type III	Type III	Type III	Type III	Type III	Type III	Type III	Type III	Type III	Type III	Type III	Type III	Type III	Type III	Type III	Type III	Type III	Type III	Type IV	Type IV	Type IV	Type IV	Type IV	Type IV	Type IV	Type IV	Type IV
						K02450	K02451	K02452	K02453	K02454	K02455	K02456	K02457	K02458	K02459	K02460	K02461	K02462	K02463	K02464	K02465	K02654	K03219	K03220	K03221	K03222	K03223	K03224	K03225	K03226	K03227	K03228	K03229	K03230	K04053	K04054	K04056	K04057	K04058	K04059	K03194	K03195	K03196	K03197	K03198	K03199	K030200	K030201	K030202
Burkholderia rhizoxinica HKI 454	Endofungal: Rhizopus microsporus	GCA_000198775.1	650716014	3750138	3938
Burkholderia terrae BS001	Fungal associated: Laccaria proxima	GCA_000265115.1	2537561811	11294072	10290				3	3	3	7											2																			2			2	2
Burkholderia ginsengisoli NBRC 100965	Soil	GCA_000739735.1	2600255070	6541887	5858
Burkholderia sp. 9120		GCA_000745015.1	2582580720	8455632	7578						2		2	2	2	4										2	2	2	2	2	2	2	2	2
Burkholderia phytofirmans PsJN	Onion rhizosphere	GCA_000020125.1	642555113	8214658	7487																																				3	3	3	2	2	3	3	3
Burkholderia CL11	Soil	N/A	2546825541	8471422	7562																		2			2		2	2	2	2	2	2	2
Burkholderia MF384	Soil	N/A	2546825545	8463171	7570											2							2			2		2	2	2	2	2	2	2
Burkholderia sp. Ch1-1	Soil	GCA_000178415.2	2508501040	8743528	8077																																				3	2	3			2	3	3
Burkholderia xenovorans LB400	Soil	GCA_000756045.1	637000053	9731138	9059																																				3	3	3	3	3	3	3	3
Burkholderia dilworthii WSM3556	Lebeckia ambigua root nodule	GCA_000472525.1	2508501124	7679067	7123
Burkholderia caledonica NBRC 102488	Soil?	GCA_000685095.1	2579779093	7282355	6648
Burkholderia MF376	Soil	N/A	2546825544	7742432	6928
Burkholderia bryophila 376MFSha3.1	Arabidopsis rhizosphere	GCA_000383275.1	2521172625	7381819	6625
Burkholderia oklahomensis C6786	Human wound	GCA_001522135.1	2627853643	7135022	6178																		4		2	4	2	4	5	4	4	4	4	4
			Average Genome Size of Non-Endohyphal Bacteria
			7.94423e+06
			891015
[truncated: 43 more columns]

## Sheet: Erwinia-Pantoea 
	Habitat of Isolation	NCBI Assembly ID	IMG Genome ID	Genome Size	Gene Count	Type II	Type II	Type II	Type II	Type II	Type II	Type II	Type II	Type II	Type II	Type II	Type II	Type II	Type II	Type II	Type II	Type II	Type III	Type III	Type III	Type III	Type III	Type III	Type III	Type III	Type III	Type III	Type III	Type III	Type III	Type III	Type III	Type III	Type III	Type III	Type IV	Type IV	Type IV	Type IV	Type IV	Type IV	Type IV	Type IV	Type IV
						K02450	K02451	K02452	K02453	K02454	K02455	K02456	K02457	K02458	K02459	K02460	K02461	K02462	K02463	K02464	K02465	K02654	K03219	K03220	K03221	K03222	K03223	K03224	K03225	K03226	K03227	K03228	K03229	K03230	K04053	K04054	K04056	K04057	K04058	K04059	K03194	K03195	K03196	K03197	K03198	K03199	K030200	K030201	K030202
Erwinia toletana DAPP-PG 735	Olive knot	GCA_000336255.1	2551306673	5199194	4916							3										2	2	1	1	2	1	2	1	2	2	2	2	2					2
Erwinia pyrifoliae DSM 12163	Necrotic tissue of Pyrus pyrifolia	GCA_000026985.1	646862321	4072827	4134																	2	2	1	1	2	1	2	2	2	2	2	2	2					2
Erwinia amylovora Ea273, ATCC 49946	Fire blight of Apple	GCA_000027205.1	646564530	3905604	3665																		3		2	3		3	3	3	3	3	3	3					3
Erwinia tasmaniensis Et1/99	Apple flowers	GCA_000026185.1	642555128	4067864	3730																		2	1	1	2		2	3	3	2	3	3	2					2		2	2	2			2	2	2
Erwinia oleae DAPP-PG531	Olive knot	GCA_000770305.1	2627854146	4744408	4744
Erwinia sp. 9145		GCA_000745075.1	2582581239	4254300	4120
Erwinia typographi M043b	Fresh water	GCA_000773975.1	2648501176	5734753	5631				2
Erwinia billingiae Eb661	Plant epiphyte	GCA_000196615.1	649633042	5372268	5015
Pantoea sp. At-9b	Leaf-cutter Ant	GCA_000175935.2	649633081	6312783	6007
Pantoea sp. GL120224-02	Plant-biomass degrading system	N/A	2545824509	5118812	4928
Pantoea stewartii stewartii DC283	Wilt of corn	GCA_000248395.2	2513237354	5233214	5181																	2	3	2	2	3		3	3	3	3	3	3	3					2							3	2
Pantoea ananatis BD442	Maize Brown stalk rot	GCA_000709995.1	2585427967	4798552	4583																																		2
Pantoea sp. aB	Leaf Cutter Ant	GCA_000179655.1	648276708	4805313	4560
Pantoea sp. MBLJ3	Laboratory	GCA_000816655.1	2627853687	4821318	4650
Pantoea vagans PaVv11	Grapevine endophyte	GCA_000148935.1	2675903586	4833016	4587
Pantoea sp. 9140		GCA_000745295.1	2582581300	4839470	4602
Pantoea sp. 9133		GCA_900067205.1	2602042078	4673532	4464
Pantoea vagans C9-1	Apple epiphyte	GCA_000148935.1	648028049	4888338	4689
Pantoea anthophila 11-2	Hypersaline water	GCA_000969395.1	2636415703	4600679	4323
Pantoea sp. Sc1	Cotton boll	GCA_000255315.2	2519899784	4447209	4133
			Average Genome Size of Non-Endohyphal Bacteria (Pantoea)				Average Genome Size of Non-Endohyphal Bacteria (Erwinia)
			4.98592e+06				4.72813e+06
			517013				882564
		Maize Brown stalk rot
[truncated: 43 more columns]

## Sheet: Luteibacter 
	Habitat of Isolation	NCBI Assembly ID	IMG Genome ID	Genome Size	Gene Count	Type II	Type II	Type II	Type II	Type II	Type II	Type II	Type II	Type II	Type II	Type II	Type II	Type II	Type II	Type II	Type II	Type II	Type III	Type III	Type III	Type III	Type III	Type III	Type III	Type III	Type III	Type III	Type III	Type III	Type III	Type III	Type III	Type III	Type III	Type III	Type IV	Type IV	Type IV	Type IV	Type IV	Type IV	Type IV	Type IV	Type IV
						K02450	K02451	K02452	K02453	K02454	K02455	K02456	K02457	K02458	K02459	K02460	K02461	K02462	K02463	K02464	K02465	K02654	K03219	K03220	K03221	K03222	K03223	K03224	K03225	K03226	K03227	K03228	K03229	K03230	K04053	K04054	K04056	K04057	K04058	K04059	K03194	K03195	K03196	K03197	K03198	K03199	K030200	K030201	K030202
Luteibacter yeojuensis SU11	Fresh water (river)	GCA_000964085.1	2639762752	4548902	4165				2	2					2	2			2																							2	2	2	2	2		2
Luteibacter sp. UNC138MFCol5.1	Arabidopsis rhizosphere	N/A	2593339266	4219513	3872				2	2									2																						2	2	2	2	2	2		2
Luteibacter sp. 329MFSha	Arabidopsis rhizosphere	N/A	2639762521	4129935	3714				2	2									2																						2	3	3	2	3	3		2
Luteibacter sp. UNCMF331Sha3.1	Arabidopsis rhizosphere	N/A	2593339239	4124669	3712				2	2					2	2			2																						2	2	2	2	2	2		4
Luteibacter sp. UNCMF366Tsu5.1	Arabidopsis rhizophere	N/A	2593339238	4182970	3674				2	2				2	2	2			2
Luteibacter rhizovicinus DSM 16549	Barley rhizosphere	GCA_001010405.1	2630968465	4523005	4244				2	2					2	2
Luteibacter sp. 9143		GCA_000745235.1	2582581258	4625266	4204				2	2									2
Luteibacter sp. 9145		GCA_000745055.1	2582581226	4559593	4111				2	2									2
Luteibacter sp. 9133		GCA_000800155.1	2585427589	4501157	3986				2	2									2																							2	2	2	2	2		3
Luteibacter sp. 22Crub2.1	Rhizosphere	N/A	2519899668	4589042	4109				2	2									2																							2	2	2	2	2		3
Luteibacter sp. 9135		GCA_000745005.1	2582580721	4485268	3839				2	2									2
Dyella japonica A8	Tropical soil	GCA_000725385.1	2588253754	4831185	3884				2	2									2
Xanthomonas campestris pv. Campestris	Pepper disease	GCA_000007145.1	637000344	5076188	4254				3	3	2	2	2	2	2	2	2	2	2																													5
				Average Genome Size of Non-Endohyphal Bacteria (Pantoea)
				4.46949e+06
				328485
[truncated: 43 more columns]

## Sheet: Curtobacterium 
	Habitat of Isolation	NCBI Assembly ID	IMG Genome ID	Genome Size	Gene Count	Type II	Type II	Type II	Type II	Type II	Type II	Type II	Type II	Type II	Type II	Type II	Type II	Type II	Type II	Type II	Type II	Type II	Type III	Type III	Type III	Type III	Type III	Type III	Type III	Type III	Type III	Type III	Type III	Type III	Type III	Type III	Type III	Type III	Type III	Type III	Type IV	Type IV	Type IV	Type IV	Type IV	Type IV	Type IV	Type IV	Type IV
						K02450	K02451	K02452	K02453	K02454	K02455	K02456	K02457	K02458	K02459	K02460	K02461	K02462	K02463	K02464	K02465	K02654	K03219	K03220	K03221	K03222	K03223	K03224	K03225	K03226	K03227	K03228	K03229	K03230	K04053	K04054	K04056	K04057	K04058	K04059	K03194	K03195	K03196	K03197	K03198	K03199	K030200	K030201	K030202
Curtobacterium sp. Leaf154	Arabidopsis phyllosphere	GCA_001424595.1	2643221904	3640711	3497
Curtobacterium sp. 314Chir4.1	Rhizosphere	N/A	2521172612	3786558	3624
Curtobacterium sp. B8	Rice stem	GCA_000333315.1	2551306668	3374750	3738
Curtobacterium sp. UNCCL20	Soil	N/A	2595698215	3853880	3693
Curtobacterium sp. 9128		N/A	2602042068	3943501	3768
Curtobacterium sp. Leaf183	Arabidopsis phyllosphere	GCA_001424385.1	2643221815	3580776	3440
Curtobacterium sp. YR515	Populus rhizosphere	N/A	2616644843	3831031	3653
Curtobacterium sp. MR_MD2014	Soil	GCA_000772085.1	2681813048	3443800	3255
Curtobacterium flaccumfaciens MEB126	Arabidopsis phyllosphere	N/A	2630968408	3684420	3558
Curtobacterium flaccumfaciens UCD-AKU	residential carpet	GCA_000349565.1 (	2547132189	3692614	3585
Curtobacterium sp. UNCCL17	Rhizosphere	GCA_000686685.1	2563366719	3908295	3732
Curtobacterium sp. Leaf261	Arabidopsis phyllosphere	GCA_001422205.1	2643221840	3926430	3593
			Average Genome Size of Non-Endohyphal Bacteria (Pantoea)
			3702115
			198379
[truncated: 43 more columns]

## Sheet: Genome Sizes All Together
Curtobacterium 9128	Luteibacter 9143	Luteibacter 9145	Luteibacter 9133	Luteibacter 9135	Erwinia 9145	Pantoea 9140	Pantoea 9133	Burkholderia 9120	Burkholderia rhizoxinica	Rhizobium 9140	Massilia 9096
3943501	4625266	4559593	4501157	4485268	4254300	4839470	4673532	8455632	3750138	5428940	5710276
3702115	4.46949e+06	4.46949e+06	4.46949e+06	4.46949e+06	4.72813e+06	4.98592e+06	4.98592e+06	7.94423e+06	7.94423e+06	5.98721e+06	6.27216e+06
198379	328485	328485	328485	328485	882564	517013	517013	891015	891015	793281	513095
